# Supplementary material for: Fecal level of butyric acid, a microbiome-derived metabolite, is increased in patients with severe carotid atherosclerosis
Source: PubMed Central journal article supplement (PMC9792531; doi:10.1038/s41598-022-26759-x), 2022-12-26

## Supplementary material

Title: Fecal level of butyric acid, a microbiome-derived metabolite, is increased in patients with severe carotid atherosclerosis

Authors: Kristine Stø<sup>1,2</sup>, Jørgen Valeur<sup>3</sup>, Thor Ueland<sup>1,4</sup>, Gunn Helen Malmstrøm<sup>3</sup>, Vigdis Bjerkeli<sup>1</sup>, Marius Trøseid<sup>1,4,5</sup>, Johannes R. Hov<sup>1,4,6,7</sup>, Kristian Holm<sup>1,4,7</sup>, Beate Vestad<sup>4,7</sup>, Bente Halvorsen<sup>1,4</sup>, Mona Skjelland<sup>1,2</sup>, Karolina R. Skagen<sup>2</sup>.

**Supplemental table 1:** Baseline characteristics in subgroups of patients with 16S rRNA analysis and plasma SCFA analysis.

**Supplemental table 2:** Table comparing levels of butyric acid and relevant butyric acid producing bacteria (genus level) between sexes and users and nonusers of statins, antibiotics and platelet inhibitors, as well as correlation with age. Analysis were restricted to patients so that the groups would be comparable. The only significant difference we observed was for *Lachnospiraceae UCG\_003* being higher in users of antibiotics.

**Supplemental table 3:** Table showing differential abundance for bacterial genera (a), families (b) and orders (c) that differed between patients and controls, before and after FDR correction.

**Supplemental figure 1:** Barplot showing top 10 bacterial genera (average abundance) in patients and controls.

**Supplemental figure 2:** Barplots of bacteria (genus-level) that differed between patients and controls.

**Supplemental table 1:** Baseline characteristics in subgroups of patients with 16S rRNA analysis and plasma SCFA analysis.

|                                        | 16S rRNA population |                  |                 | Metabolon (plasma SCFA) population |                  |                 |
|----------------------------------------|---------------------|------------------|-----------------|------------------------------------|------------------|-----------------|
|                                        | Patients<br>N=32    | Controls<br>N=32 | <i>p</i> -value | Patients<br>N=33                   | Controls<br>N=15 | <i>p</i> -value |
| Age, (years) *                         | 73 (7)              | 67 (8)           | 0.002           | 72 (7)                             | 71 (3)           | 0.224           |
| Male sex                               | 44 (14)             | 25 (8)           | 0.114           | 45 (15)                            | 47 (7)           | 0.938           |
| Body Mass Index (kg/m <sup>2</sup> )   | 24.9 (3.7)          | 24.6 (3.0)       | 0.816           | 26.2 (4.0)                         | 24.4 (3.4)       | 0.129           |
| Waist-hip ratio (cm/cm)                | 0.95 (0.09)         | 0.89 (0.07)      | 0.012           | 0.97 (0.08)                        | 0.91 (0.06)      | 0.018           |
| Hypertension                           | 87.5 (28)           | 21.9 (7)         | <0.001          | 84.8 (28)                          | 20.0 (3)         | <0.001          |
| Type 2 Diabetes mellitus               | 25.0 (8)            | 0 (0)            | 0.002           | 27.3 (9)                           | 0 (0)            | 0.025           |
| Hypercholesterolemia                   | 68.8 (22)           | 18.8 (6)         | <0.001          | 57.6 (19)                          | 6.7 (1)          | 0.001           |
| Anti-platelet treatment                | 78.1 (25)           | 9.4 (3)          | <0.001          | 81.8 (27)                          | 6.7 (1)          | <0.001          |
| Statin treatment                       | 81.3 (26)           | 9.4 (3)          | <0.001          | 78.8 (26)                          | 0 (0)            | <0.001          |
| C-reactive protein, (mg/L)*            | 3.3 (5.6)           | 1.3 (1.0)        | 0.256           | 3.7 (5.7)                          | 1.3 (1.1)        | 0.124           |
| Leukocyte count, (10 <sup>9</sup> /L)* | 7.9 (2.0)           | 5.0 (1.1)        | <0.001          | 8.0 (2.0)                          | 5.1 (1.2)        | <0.001          |
| Total cholesterol, (mM)*               | 4.1 (1.0)           | 5.3 (0.88)       | <0.001          | 3.9 (1.0)                          | 5.6 (1.0)        | <0.001          |
| LDL cholesterol, (mM)*                 | 2.2 (0.9)           | 3.2 (0.8)        | <0.001          | 2.1 (0.8)                          | 3.4 (1.0)        | <0.001          |
| HbA1c (%)*                             | 5.8 (0.9)           | 5.2 (0.3)        | 0.010           | 5.9 (1.0)                          | 5.3 (0.3)        | 0.012           |
| Antibiotics last 3 months              | 25.0 (8)            | 0 (0)            | 0.002           | 27.3 (9)                           | 0 (0)            | 0.025           |

Values are given as % (n) or \*mean (SD).

**Supplemental table 2:** Table comparing levels of butyric acid and relevant butyric acid producing bacteria (genus level) between sexes and users and nonusers of statins, antibiotics and platelet inhibitors, as well as correlation with age. Analysis were restricted to patients so that the groups would be comparable. The only significant difference we observed was for *Lachnospiraceae UCG\_003* being higher in users of antibiotics.

|                         | Sex     |         |       | Statins |         |       | Antibiotics last 3 months |                |              | Platelet inhibitor |         |       | Correlation with age* |
|-------------------------|---------|---------|-------|---------|---------|-------|---------------------------|----------------|--------------|--------------------|---------|-------|-----------------------|
|                         | women   | men     | p     | yes     | no      | p     | yes                       | no             | p            | yes                | no      | p     |                       |
| Faecalibacterium        | 7,7E-02 | 7,2E-02 | 0,676 | 7,4E-02 | 7,8E-02 | 0,866 | 7,3E-02                   | 7,6E-02        | 0,931        | 7,5E-02            | 7,6E-02 | 0,802 | 0.02                  |
| Roseburia               | 1,5E-02 | 1,2E-02 | 0,704 | 1,5E-02 | 1,2E-02 | 0,923 | 1,1E-02                   | 1,5E-02        | 0,528        | 1,2E-02            | 2,2E-02 | 0,101 | -0.05                 |
| anaerotruncus           | 2,3E-04 | 1,6E-04 | 0,617 | 2,3E-04 | 6,3E-05 | 0,178 | 2,4E-04                   | 1,9E-04        | 0,114        | 2,3E-04            | 9,4E-05 | 0,457 | 0.17                  |
| ruminococcus_gnavus     | 5,3E-01 | 6,7E-01 | 0,063 | 7,9E-03 | 3,1E+00 | 0,648 | 2,0E-03                   | 7,9E-01        | 0,355        | 7,6E-01            | 0,0E+00 | 0,038 | -0.32                 |
| coprococcus             | 6,4E-03 | 8,7E-03 | 0,371 | 6,4E-03 | 1,2E-02 | 0,184 | 6,1E-03                   | 7,8E-03        | 0,472        | 7,2E-03            | 7,9E-03 | 0,273 | -0.25                 |
| eubacterium_eligens     | 2,3E-03 | 2,0E-03 | 0,818 | 1,8E-03 | 3,7E-03 | 0,981 | 1,3E-03                   | 2,5E-03        | 0,114        | 1,7E-03            | 4,0E-03 | 0,27  | 0.26                  |
| CAG_56                  | 1,5E-03 | 1,5E-03 | 0,898 | 1,6E-03 | 1,1E-03 | 0,143 | 9,2E-04                   | 1,7E-03        | 0,353        | 1,3E-03            | 2,3E-03 | 0,343 | 0.32                  |
| Lachnospiraceae UCG_003 | 1,5E-04 | 6,7E-05 | 0,892 | 3,6E-05 | 4,6E-04 | 0,227 | <b>4,6E-04</b>            | <b>0,0E+00</b> | <b>0,013</b> | 1,5E-04            | 0,0E+00 | 0,447 | 0.06                  |
| Fecal butyric acid      | 13,29   | 9,78    | 0,056 | 11,62   | 12,17   | 0,834 | 12,28                     | 11,59          | 0,571        | 12,61              | 7,93    | 0,142 | -0.14                 |

\*Spearman correlation, no significant findings

**Supplemental table 3:** Table showing differential abundance for bacterial genera (a), families (b) and orders (c) that differed between patients and controls, before and after FDR correction.

**a) Mann-Whitney on rarefied data (genus level) Wilcoxon (rarefied): control\_patient, 1 vs 2**

| Genus                                                                      | mean_1    | mean_2    | Wilcoxon_pvalue | Wilcoxon_pvalue_fdr |
|----------------------------------------------------------------------------|-----------|-----------|-----------------|---------------------|
| Lachnospirales;f__Lachnospiraceae;g__Frisingicoccus                        | 0.0000767 | 0.0006014 | 0.0021023       | 0.1881198           |
| Lachnospirales;f__Lachnospiraceae;g__Lachnospiraceae_UCG-003               | 0.0010937 | 0.0001150 | 0.0028881       | 0.1881198           |
| Lachnospirales;f__Lachnospiraceae;g__[Eubacterium]_eligens_group           | 0.0044870 | 0.0021846 | 0.0040025       | 0.1881198           |
| Lachnospirales;f__Lachnospiraceae;g__Coproccoccus                          | 0.0128626 | 0.0073880 | 0.0105049       | 0.3702969           |
| Gastranaerophilales;f__Gastranaerophilales;g__Gastranaerophilales          | 0.0043986 | 0.0004127 | 0.0238752       | 0.3870909           |
| Erysipelotrichales;f__Erysipelotrichaceae;g__[Clostridium]_innocuum_group  | 0.0000472 | 0.0002889 | 0.0242896       | 0.3870909           |
| Desulfovibrionales;f__Desulfovibrionaceae;g__uncultured                    | 0.0002506 | 0.0001032 | 0.0306311       | 0.3870909           |
| Peptostreptococcales-Tissierellales;f__Peptostreptococcaceae;g__Romboutsia | 0.0085171 | 0.0026209 | 0.0325404       | 0.3870909           |
| Oscillospirales;f__UCG-010;g__UCG-010                                      | 0.0098143 | 0.0040360 | 0.0330891       | 0.3870909           |
| Lachnospirales;f__Lachnospiraceae;g__CAG-56                                | 0.0018779 | 0.0014947 | 0.0339882       | 0.3870909           |
| Victivallales;f__Victivallaceae;g__Victivallis                             | 0.0002889 | 0.0000796 | 0.0343061       | 0.3870909           |
| Oscillospirales;f__Ruminococcaceae;g__Anaerotruncus                        | 0.0001032 | 0.0001975 | 0.0346723       | 0.3870909           |
| Lachnospirales;f__Lachnospiraceae;g__[Ruminococcus]_gnavus_group           | 0.0007488 | 0.0066156 | 0.0356892       | 0.3870909           |

**b) Mann-Whitney on rarefied data (Family level) Wilcoxon (rarefied): control\_patient, 1 vs 2**

| Family                                                          | mean_1    | mean_2    | Wilcoxon_pvalue | Wilcoxon_pvalue_fdr |
|-----------------------------------------------------------------|-----------|-----------|-----------------|---------------------|
| o__Peptostreptococcales-Tissierellales;f__Peptostreptococcaceae | 0.0137588 | 0.0055896 | 0.0201475       | 0.421886            |
| o__Gastranaerophilales;f__Gastranaerophilales                   | 0.0043986 | 0.0004127 | 0.0238752       | 0.421886            |
| o__Victivallales;f__Victivallaceae                              | 0.0003361 | 0.0000884 | 0.0328090       | 0.421886            |
| o__Oscillospirales;f__UCG-010                                   | 0.0098143 | 0.0040360 | 0.0330891       | 0.421886            |

**c) Mann-Whitney on rarefied data (Order level) Wilcoxon (rarefied): control\_patient, 1 vs 2**

| Order                                  | mean_1    | mean_2    | Wilcoxon_pvalue | Wilcoxon_pvalue_fdr |
|----------------------------------------|-----------|-----------|-----------------|---------------------|
| o__Peptostreptococcales-Tissierellales | 0.0183166 | 0.0093072 | 0.0113657       | 0.3296044           |
| o__Gastranaerophilales                 | 0.0043986 | 0.0004127 | 0.0238752       | 0.3461906           |

**Supplemental figure 1:** Barplot showing top 10 bacterial genera (average abundance) in patients and controls.

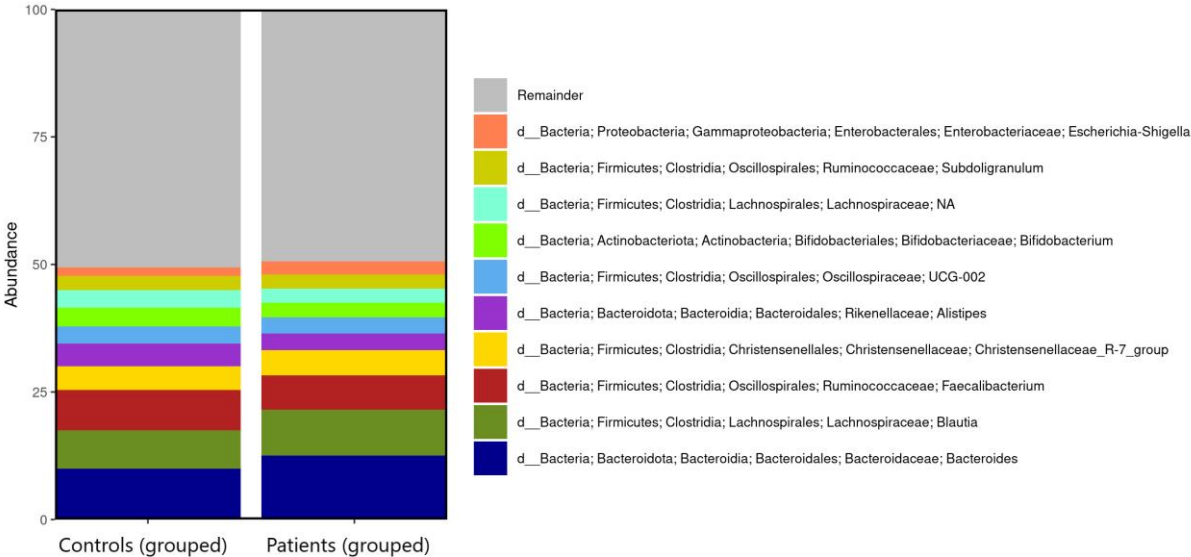

Supplemental figure 2: Barplots of bacteria (genus-level) that differed between patients and controls.

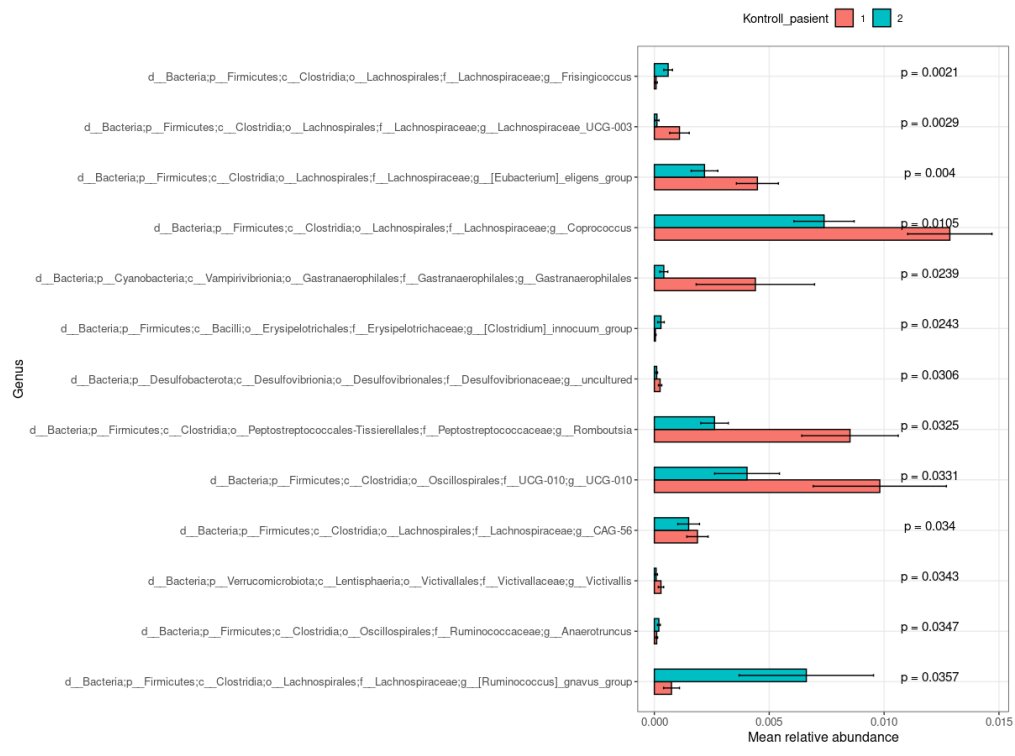

Supplement: 41598_2022_26759_MOESM1_ESM.pdf [file 41598_2022_26759_MOESM1_ESM.pdf]
